# Supplementary material for: A computational framework for distinguishing directversusindirect interactions in human functional protein–protein interaction networks
Source: Royal Society of Chemistry journal article supplement (doi:10.1039/c7ib00013h), 2017-05-19
Supplement: c7ib00013h1.zip [file c7ib00013h1.zip]

# ESI Figure Captions

# Figure S1 Figure file contains the distribution of homolog sequence similarity. (PDF)

# File S1 Text file contains the interactome-scale predictions. (TXT)

# File S2 Text file contains the predicted indirect interactions. (TXT)

# File S3 Text file contains the cascades of physical PPIs between indirectly interacting genes in the HPRD database. (TXT)

# File S4 Text file contains the cascades of physical PPIs between indirectly interacting genes in the BioGrid database. (TXT)

# File S5 Text file contains the pathways enrichment analysis results of the cascades of physical PPIs between indirectly interacting genes in the HPRD database. (TXT)

# File S6 Text file contains the pathways enrichment analysis results of the cascades of physical PPIs between indirectly interacting genes in the BioGrid database. (TXT)
