# Supplementary figures and images for: A computational framework for distinguishing directversusindirect interactions in human functional protein–protein interaction networks
Source: Royal Society of Chemistry journal article supplement (doi:10.1039/c7ib00013h), 2017-05-19

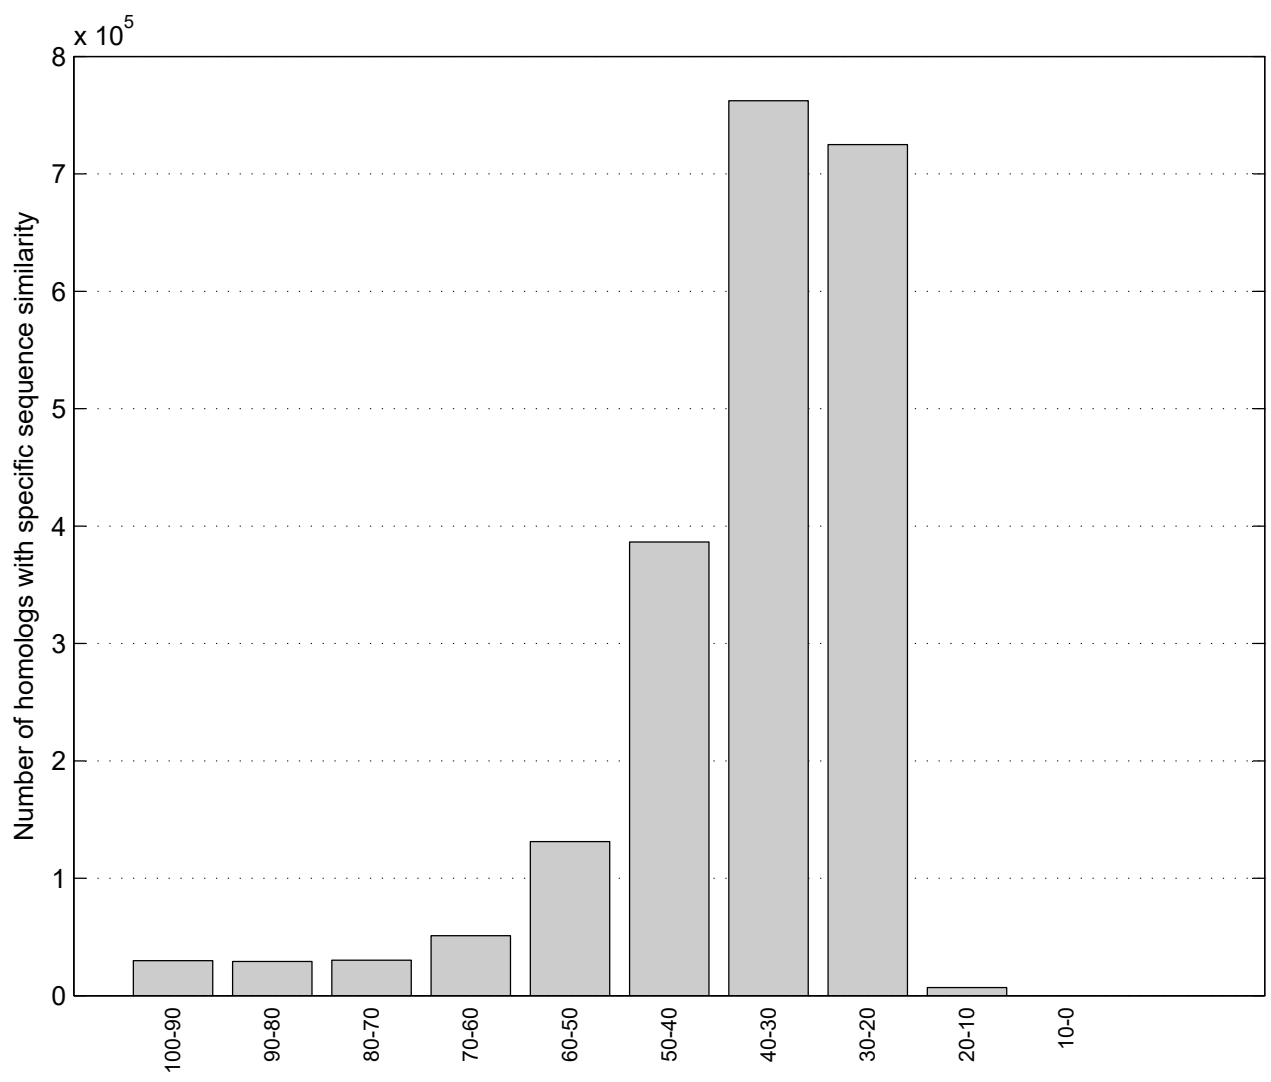

Supplement: c7ib00013h1.zip [file c7ib00013h1.zip]
